# Supplementary material for: The Effects of Exercise on BDNF Levels in Adolescents: A Systematic Review with Meta-Analysis
Source: PubMed Central journal article supplement (PMC7503913; doi:10.3390/ijerph17176056), 2020-08-20
Supplement: ijerph-17-06056-s001.pdf [file ijerph-17-06056-s001.pdf]

# The effects of exercise on BDNF levels in adolescents: A Systematic Review with Meta-Analysis

Kesley Pablo Morais de Azevedo <sup>1</sup>, Victor Hugo de Oliveira <sup>1</sup>, Gidyenne Christine Bandeira Silva de Menezes <sup>1</sup>, Ádala Nayana de Sousa Mata <sup>1</sup>, Daniel Ángel García <sup>2</sup>, Daniel Guillén Martínez <sup>3</sup>, José Carlos Leitão <sup>4</sup>, Maria Irany Knackfuss <sup>5</sup> and Grasiela Piuvezam <sup>1</sup>

Table S1. Search strategies for each database.

| Database       | Search Strategies                                                                                                                                                                                                                                                                                  | Number of Articles |
|----------------|----------------------------------------------------------------------------------------------------------------------------------------------------------------------------------------------------------------------------------------------------------------------------------------------------|--------------------|
| SCOPUS         | ("exercise") AND ("BDNF" OR "Brain Derived Neurotrophic Factor") AND ("adolescent" OR "teenager") AND (LIMIT-TO (DOCTYPE, "ar") OR LIMIT-TO (DOCTYPE, "sh"))                                                                                                                                       | (n = 574)          |
| PUBMED         | ("exercise") AND ("BDNF" OR "Brain Derived Neurotrophic Factor") AND ("adolescent" OR "teenager")                                                                                                                                                                                                  | (n = 550)          |
| WEB OF SCIENCE | TS= ("exercise" AND "BDNF" OR "Brain Derived Neurotrophic Factor" AND "adolescent" OR "teenager" AND "clinical trials") NOT TS=animals<br>Refinado por: TIPOS DE DOCUMENTO: (ARTICLE OR EARLY ACCESS)<br>Índices=SCI-EXPANDED, SSCI, A&HCI, CPCI-S, CPCI-SSH, ESCI Tempo estipulado= Todos os anos | (n = 1128)         |
| SCIENCEDIRECT  | ("exercise") AND ("BDNF" OR "Brain Derived Neurotrophic Factor") AND ("adolescent" OR "teenager")<br>Refinado por: TIPOS DE DOCUMENTO: (ARTICLE OR EARLY ACCESS)                                                                                                                                   | (n = 141)          |
| COCHRANE       | ("exercise") AND ("BDNF" OR "Brain Derived Neurotrophic Factor") AND ("adolescent OR teenager")                                                                                                                                                                                                    | (n =19)            |
| EMBASE         | (exercise) AND (BDNF OR Brain Derived Neurotrophic Factor) AND (adolescent OR teenager)                                                                                                                                                                                                            | (n = 123)          |
| SPORTDiscus    | ("exercise" AND "BDNF" OR "Brain Derived Neurotrophic Factor" AND "adolescent" OR "teenager" AND "clinical trials")                                                                                                                                                                                | (n = 143)          |
| CINAHL         | ("exercise" AND "BDNF" OR "Brain Derived Neurotrophic Factor" AND "adolescent" OR "teenager" AND "clinical trials")                                                                                                                                                                                | (n = 220)          |

**Table S2.** Risk of bias in RCTs (Rob 2.0).

|                             | <b>Randomization Process</b> | <b>Deviations from the Intended Interventions</b> | <b>Missing Outcome Data</b> | <b>Measurement of the Outcome</b> | <b>Selection of the Reported Result</b> | <b>Overall Bias</b> |
|-----------------------------|------------------------------|---------------------------------------------------|-----------------------------|-----------------------------------|-----------------------------------------|---------------------|
| Goldfield et al. (2018) [4] | Low                          | Low                                               | Low                         | Low                               | Low                                     | Low                 |
| Jeon and Ha (2017) [15]     | Some concerns                | Low                                               | Low                         | Low                               | Low                                     | Some concerns       |
| Jeon and Ha (2015) [16]     | Some concerns                | Low                                               | Low                         | Low                               | Low                                     | Some concerns       |
| Kim et al. (2015) [33]      | Some concerns                | Some concerns                                     | Low                         | Low                               | Low                                     | Some concerns       |

**Table S3.** Risk of bias in non-RCTs (ROBINS-I).

|                          | <b>Confounding</b> | <b>Selection of Participants</b> | <b>Classification of Interventions</b> | <b>Departures from Intended Interventions</b> | <b>Missing Data</b> | <b>Measurement of Outcomes</b> | <b>Selection of Reported Results</b> | <b>Overall Judgment</b> |
|--------------------------|--------------------|----------------------------------|----------------------------------------|-----------------------------------------------|---------------------|--------------------------------|--------------------------------------|-------------------------|
| Lee et al. (2014) [34]   | Serious            | Low                              | Low                                    | Low                                           | Critical            | Low                            | Low                                  | Critical                |
| Shim and Kim (2012) [35] | Low                | Low                              | Moderate                               | Low                                           | Low                 | Low                            | Low                                  | Moderate                |
